# Supplementary material for: Off-Stoichiometry Thiol–Ene Polymers: Inclusion of Anchor Groups Using Allylsilanes
Source: MDPI journal article supplement (doi:10.3390/polym15061329), 2023-03-07
Supplement: s1 [file s1]

## Supplementary Material

# Off-stoichiometry thiol-ene polymers: inclusion of anchor groups using allylsilanes

Kirill Puchnin, Dmitriy Ryazantsev, Egor Latipov, Vitaliy Grudtsov and Alexander Kuznetsov

puchninkv@yandex.ru

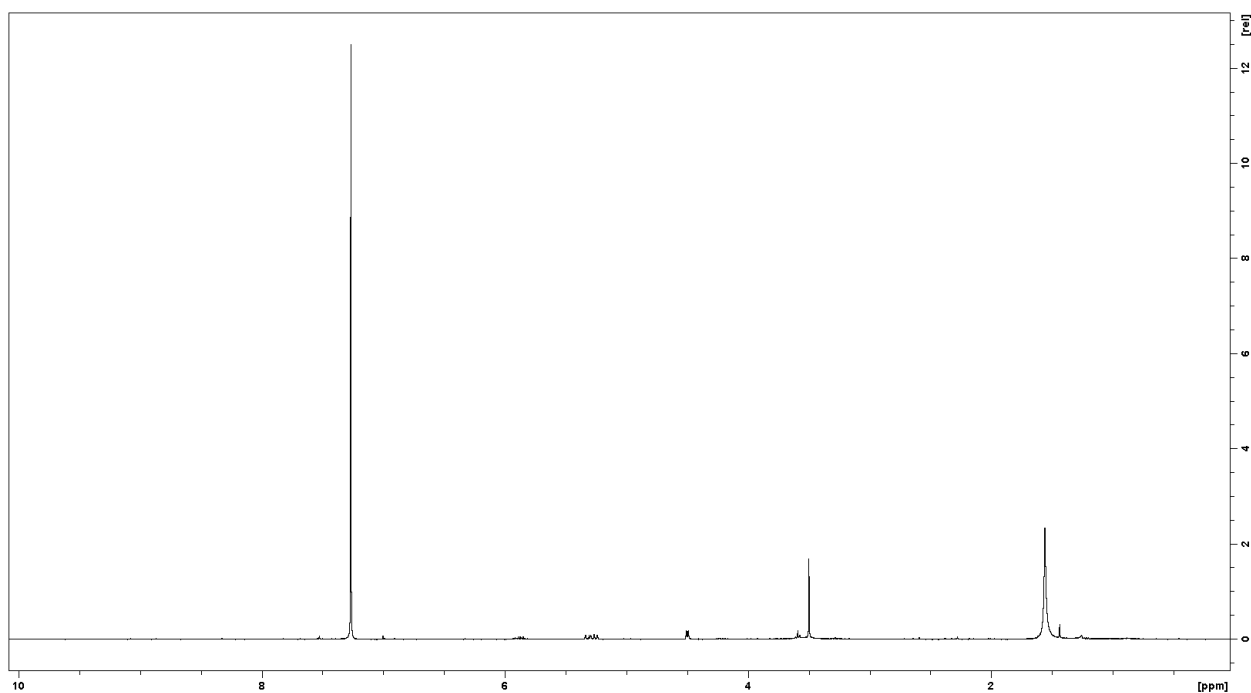

**Figure S1.** NMR spectrum of the extract of OSTE-AS after aging for 1 hour ( $\text{CDCl}_3$ ).

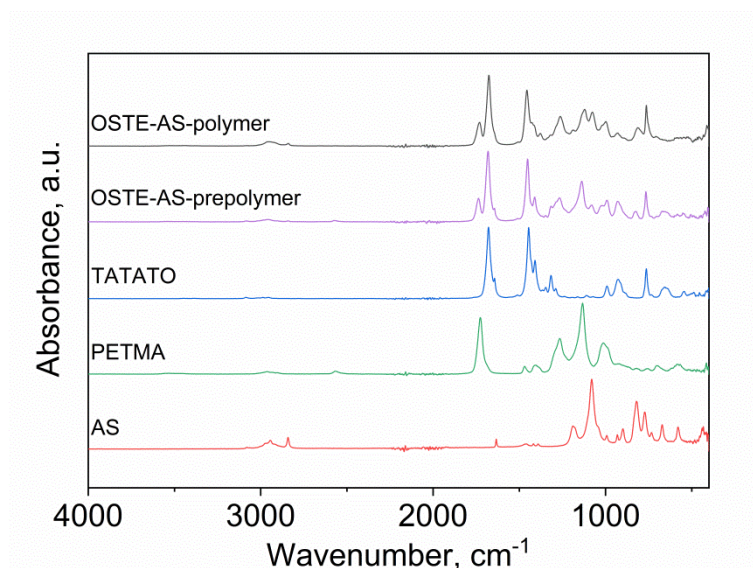

**Figure S2.** FT-IR spectra of OSTE-AS polymer, OSTE-MS prepolymer, and reagents (TATATO, PETMA, AS).

**Table S1.** The contact angle of the OSTE-AS prepolymer on a silicon wafer in various allylsilane concentrations.

| wt (AS), % | Contact angle, ° |
|------------|------------------|
| 0.8        | 34               |
| 2.0        | 32               |
| 4.0        | 28               |
| 5.9        | 24               |
| 7.7        | 23               |
| 9.4        | 15               |

**Table S2.** The viscosity of the OSTE-AS prepolymer with various allylsilane concentrations and temperatures.

| wt (AS), % | Viscosity, Pa · s |      |      |
|------------|-------------------|------|------|
| T, °C      | 15                | 20   | 25   |
| 0.0        | 0.86              | 0.61 | 0.44 |
| 2.0        | 0.62              | 0.45 | 0.33 |
| 4.0        | 0.46              | 0.35 | 0.27 |
| 5.9        | 0.35              | 0.27 | 0.22 |
| 7.7        | 0.28              | 0.22 | 0.19 |

**Table S3.** OSTE-AS polymer size change during conditioning in various solvents.

| Solvent            | $\Delta l$ , % |             |             |
|--------------------|----------------|-------------|-------------|
| Time, h            | 1              | 24          | 168         |
| Methanol           | 0.1            | -0.2        | 0.4         |
| Ethanol            | 0.7            | 0.5         | 0.5         |
| 2-Propanol         | -0.6           | -0.2        | 0.5         |
| Hexane             | -0.7           | -0.1        | -0.3        |
| White spirit       | 0.0            | 0.2         | 0.4         |
| Toluene            | -0.4           | -0.5        | -0.2        |
| Tetrachloromethane | 0.0            | 0.1         | 0.1         |
| Benzene            | -0.1           | -0.1        | 0.0         |
| Acetic acid        | -1.0           | -0.7        | -0.6        |
| Ethyl acetate      | 0.4            | 0.0         | 0.4         |
| 2-Butanone         | -0.5           | 0.6         | 3.1         |
| Tetrahydrofuran    | 0.0            | 0.4         | 2.1         |
| Acetone            | -0.5           | 0.5         | 2.3         |
| Dimethyl sulfoxide | 0.2            | 0.7         | 2.1         |
| Acetonitrile       | -0.2           | 0.8         | degradation |
| Dimethylformamide  | 0.2            | 1.8         | degradation |
| Chloroform         | 0.6            | degradation | degradation |
| Dichloromethane    | 1.3            | degradation | degradation |

**Table S4.** OSTe-AS polymer weight change during conditioning in various solvents.

| Solvent            | $\Delta m$ , % |             |             |
|--------------------|----------------|-------------|-------------|
| Time, h            | 1              | 24          | 168         |
| Methanol           | 0.0            | 0.0         | 0.2         |
| Ethanol            | -0.1           | -0.1        | 0.0         |
| 2-Propanol         | 0.0            | -0.1        | -0.2        |
| Hexane             | 0.0            | -0.1        | 0.0         |
| White spirit       | 0.1            | 0.0         | 0.0         |
| Toluene            | 0.0            | -0.1        | 0.1         |
| Tetrachloromethane | 0.0            | -0.1        | 0.0         |
| Benzene            | 0.0            | 0.0         | 0.3         |
| Acetic acid        | 0.1            | 0.2         | 0.6         |
| Ethyl acetate      | 0.1            | 0.3         | 1.0         |
| 2-Butanone         | 0.5            | 1.5         | 4.6         |
| Tetrahydrofuran    | 0.4            | 1.7         | 5.3         |
| Acetone            | 0.5            | 1.9         | 6.5         |
| Dimethyl sulfoxide | 0.5            | 2.4         | 7.3         |
| Acetonitrile       | 1.0            | 3.7         | degradation |
| Dimethylformamide  | 1.0            | 3.8         | degradation |
| Chloroform         | 2.7            | degradation | degradation |
| Dichloromethane    | 6.2            | degradation | degradation |

**Table S5.** OSTe-AS polymer hardness change during conditioning in various solvents.

| Solvent            | HD   |             |             |
|--------------------|------|-------------|-------------|
| Time, h            | 1    | 24          | 168         |
| Methanol           | 82.5 | 82.5        | 82.0        |
| Ethanol            | 84.0 | 84.0        | 84.0        |
| 2-Propanol         | 83.0 | 83.5        | 84.0        |
| Hexane             | 82.5 | 84.0        | 83.0        |
| White spirit       | 83.0 | 82.0        | 84.0        |
| Toluene            | 82.5 | 82.5        | 82.5        |
| Tetrachloromethane | 84.0 | 84.0        | 83.5        |
| Benzene            | 83.5 | 84.0        | 83.0        |
| Acetic acid        | 82.0 | 81.5        | 81.0        |
| Ethyl acetate      | 84.0 | 84.0        | 83.5        |
| 2-Butanone         | 82.0 | 78.0        | 68.0        |
| Tetrahydrofuran    | 81.0 | 79.5        | 73.0        |
| Acetone            | 84.0 | 81.0        | 68.5        |
| Dimethyl sulfoxide | 83.5 | 81.0        | 73.0        |
| Acetonitrile       | 81.0 | 75.0        | degradation |
| Dimethylformamide  | 82.0 | 77.0        | degradation |
| Chloroform         | 81.5 | degradation | degradation |
| Dichloromethane    | 71.0 | degradation | degradation |
